# Supplementary material for: Development of a highly sensitive real-time immuno-PCR for the measurement of chloramphenicol in milk based on magnetic bead capturing
Source: Royal Society of Chemistry journal article supplement (doi:10.1039/c4ay02158d), 2014-01-01
Supplement: c4ay02158d1.pdf [file c4ay02158d1.pdf]

1

## Supplementary materials

2 Development of a Highly Sensitive Real Time Immuno-PCR for the Measurement of

3 Chloramphenicol in Milk Based on Magnetic Beads Capturing

4

5 Xiaoqi Tao<sup>1</sup>, Zhifei He<sup>1</sup>, Xingyuan Cao<sup>2</sup>, Jianzhong Shen<sup>2</sup>, Hongjun Li<sup>1\*</sup>

6

7 <sup>1</sup>College of Food Science, Southwest University, Chongqing, 400715, PR China

8

9 <sup>2</sup>Department of Veterinary Pharmacology and Toxicology, College of Veterinary

10 Medicine, China Agricultural University, Beijing 100193, China

12

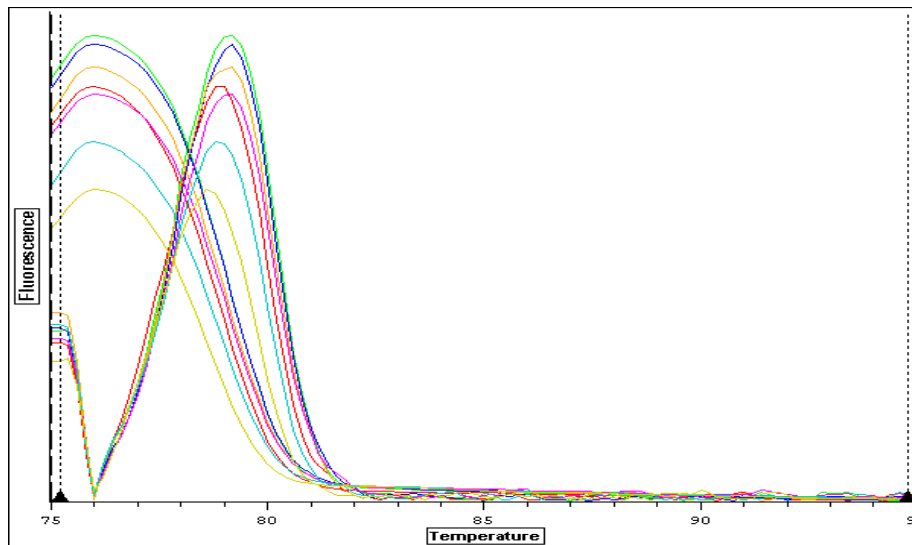

13

14

15 Supplementary Figure 1 Melting curve analysis of RT-IPCR for CAP

16

17

18 Procedure of direct competitive CL-ELISA

19 Plates were coated overnight at 4 °C with 100  $\mu$ L of CAP-OVA dissolved in buffer a

20 (1.5  $\mu$ g/mL). The plates were washed with 260  $\mu$ L/well buffer c manually three times,

21 blocked with 200  $\mu$ L/well of buffer b and incubated at 37 °C for 1 hour. After the

22 plates were washed as described above, then 100  $\mu$ L/well of mixture of DNA reporters

23 (1.5  $\mu$ g/mL) and HRP-conjugated anti-CAP MAb (1/5000 dilution) (scheme A) or 100

24  $\mu$ L/well of HRP-conjugated anti-CAP MAb (1/5000 dilution)(scheme B) in buffer d

25 were added, respectively. The competitive reaction was allowed to take place for 30

26 min at room temperature. After washing five times and finally the HRP tracer activity

27 was revealed by adding 100  $\mu$ L/well of a freshly prepared substrate mixture of

28 SuperSignal substrate solution. The intensity of light emission was measured at 425

29 nm using a chemiluminescence reader immediately after the addition of the substrate  
30 and the results were expressed in relative light units (RLU). Eventually, the RLU for  
31 scheme A was equal to that for scheme B when the concentration of **anti-CAP** was 0,  
32 proving that the DNA reporters in scheme A did not bind with **anti-CAP**.
